# Supplementary material for: Protective role of TNF-α, IL-10 and IL-2 in mice infected with the Oshima strain of Tick-borne encephalitis virus
Source: PubMed Central journal article supplement — Sci Rep. 2014 Jun 18;4:5344. doi: 10.1038/srep05344 (PMC4061546; doi:10.1038/srep05344), 2014-06-18
Supplement: srep05344-s1.pdf [file srep05344-s1.pdf]

## **Supplementary information for**

### **Title**

Protective role of TNF- $\alpha$ , IL-10 and IL-2 in mice infected with the Oshima strain of Tick-borne encephalitis virus

### **Authors**

Mya Myat Ngwe Tun<sup>1</sup>, Kotaro Aoki<sup>1</sup>, Masachika Senba<sup>2</sup>, Corazon C. Buerano<sup>1</sup>, Kenji Shirai<sup>3</sup>, Ryuji Suzuki<sup>3</sup>, Kouichi Morita<sup>1</sup> and Daisuke Hayasaka<sup>1\*</sup>

### **Affiliation**

<sup>1</sup>Department of Virology and <sup>2</sup>Department of Pathology, Institute of Tropical Medicine, Leading Graduate School Program, Nagasaki University, 852-8523, Nagasaki, Japan

<sup>3</sup>Clinical Research Center, National Hospital Organization Sagamihara Hospital, Sakuradai 18-1, Sagamihara, Kanagawa 228-8522, Japan.

\*Corresponding author: Daisuke Hayasaka, Department of Virology, Institute of Tropical Medicine, Nagasaki University, 1-12-4 Sakamoto, Nagasaki, 852-8523, Japan. Phone number: +81-95-819-7828. Fax number: +81-95-819-7830. E-mail address: hayasaka@nagasaki-u.ac.jp

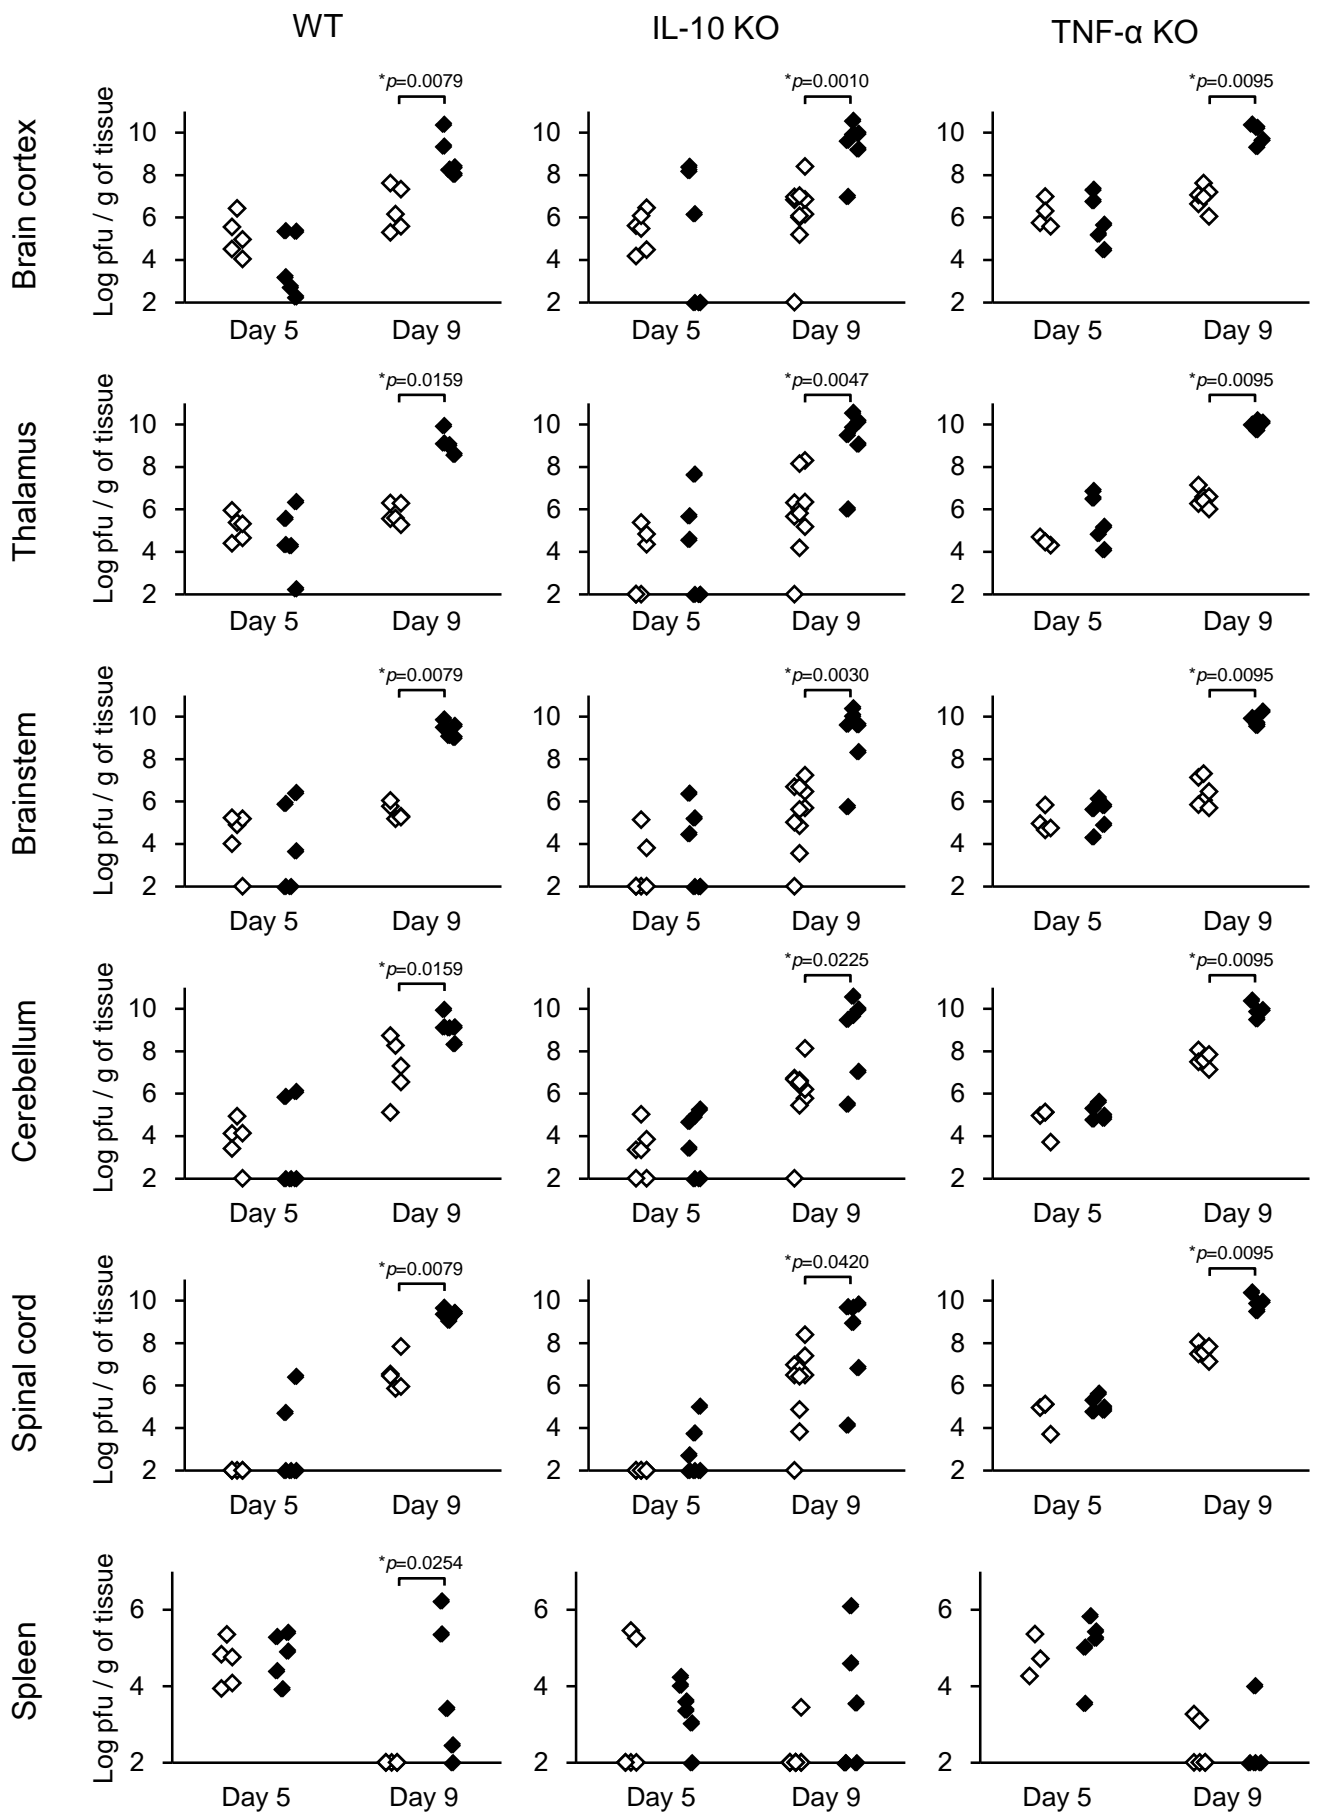

## (a) Oshima

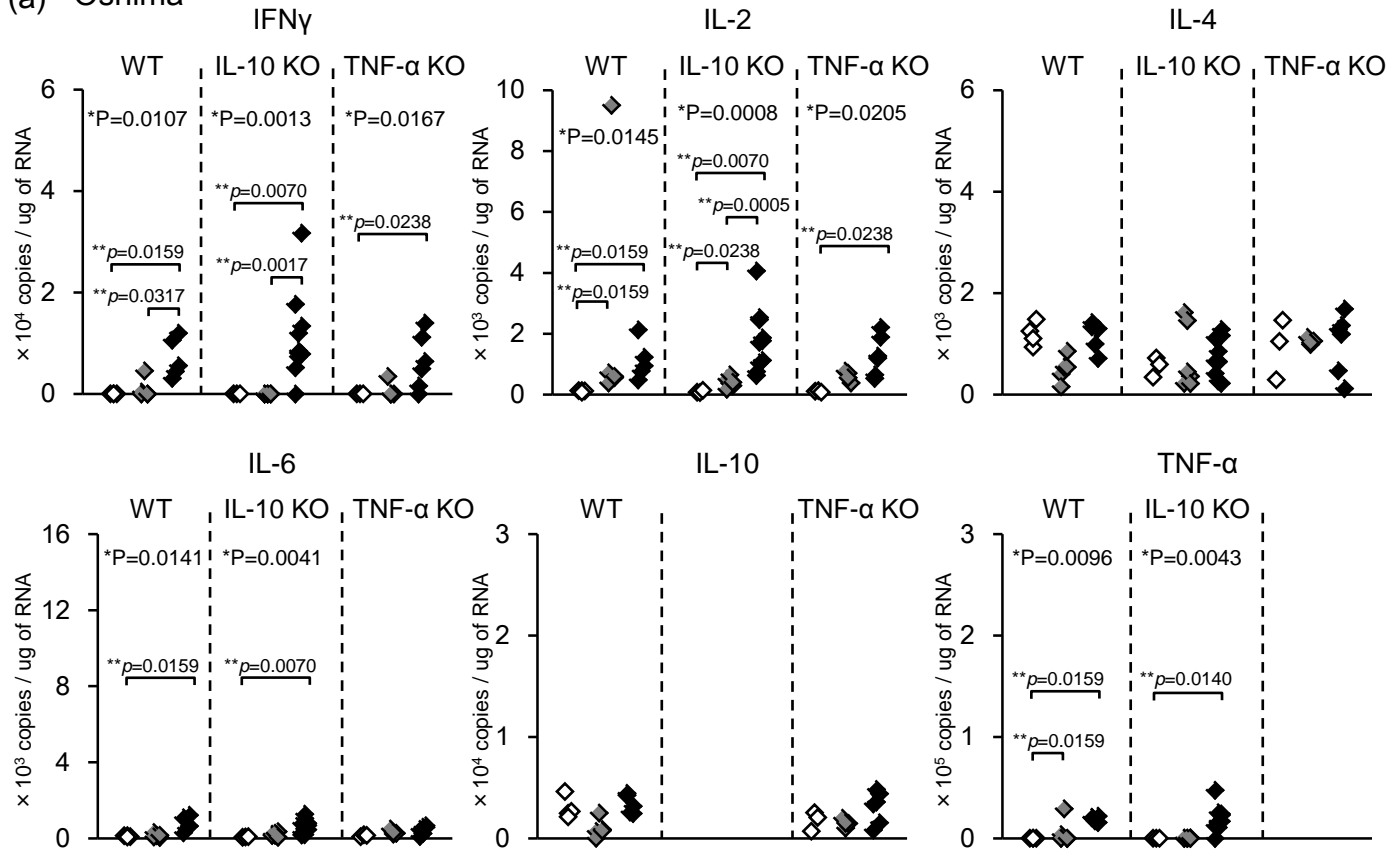

## (b) Sofjin

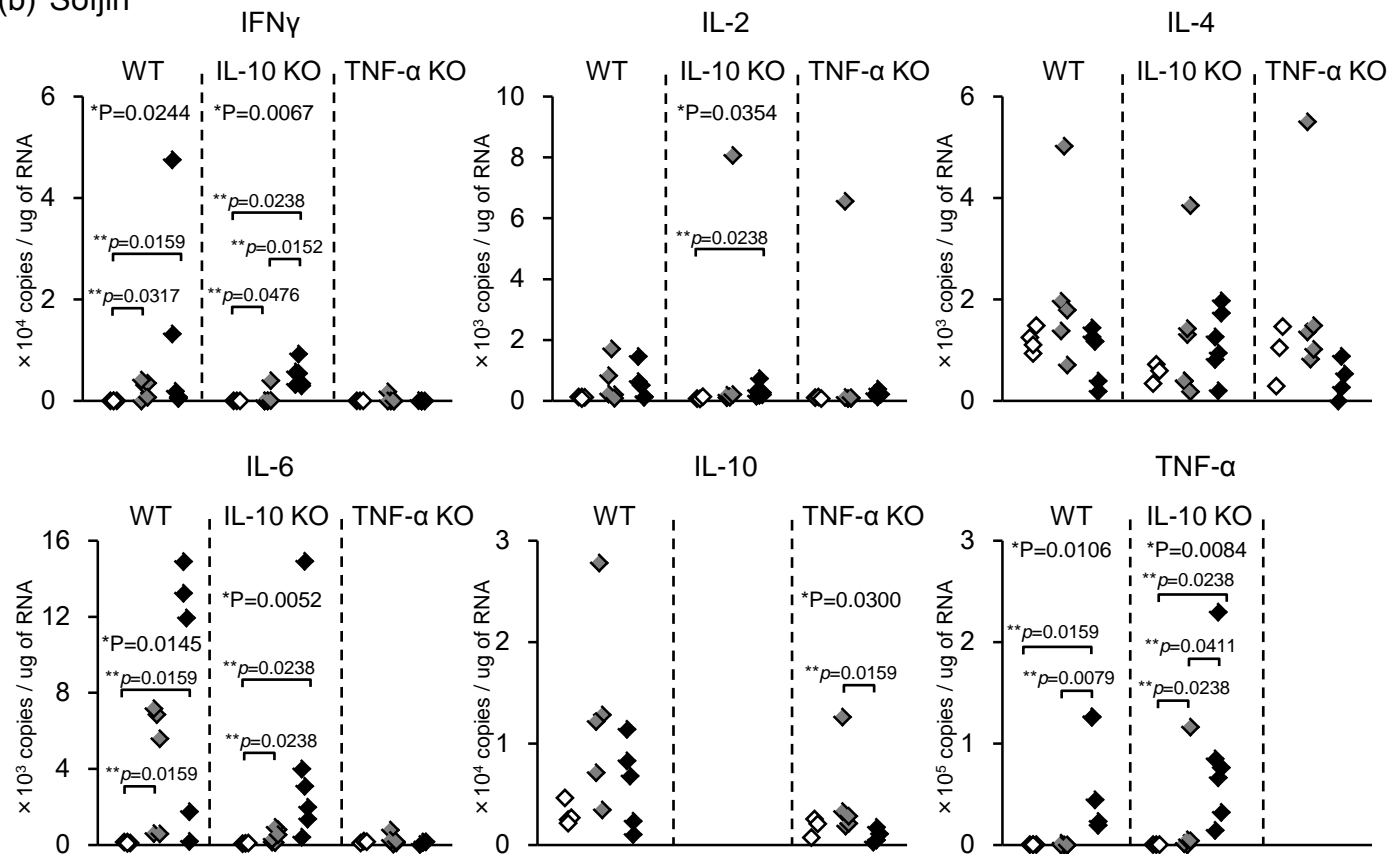

Supplementary figure 3

○ Mock ◇ Oshima ◇ Sofjin

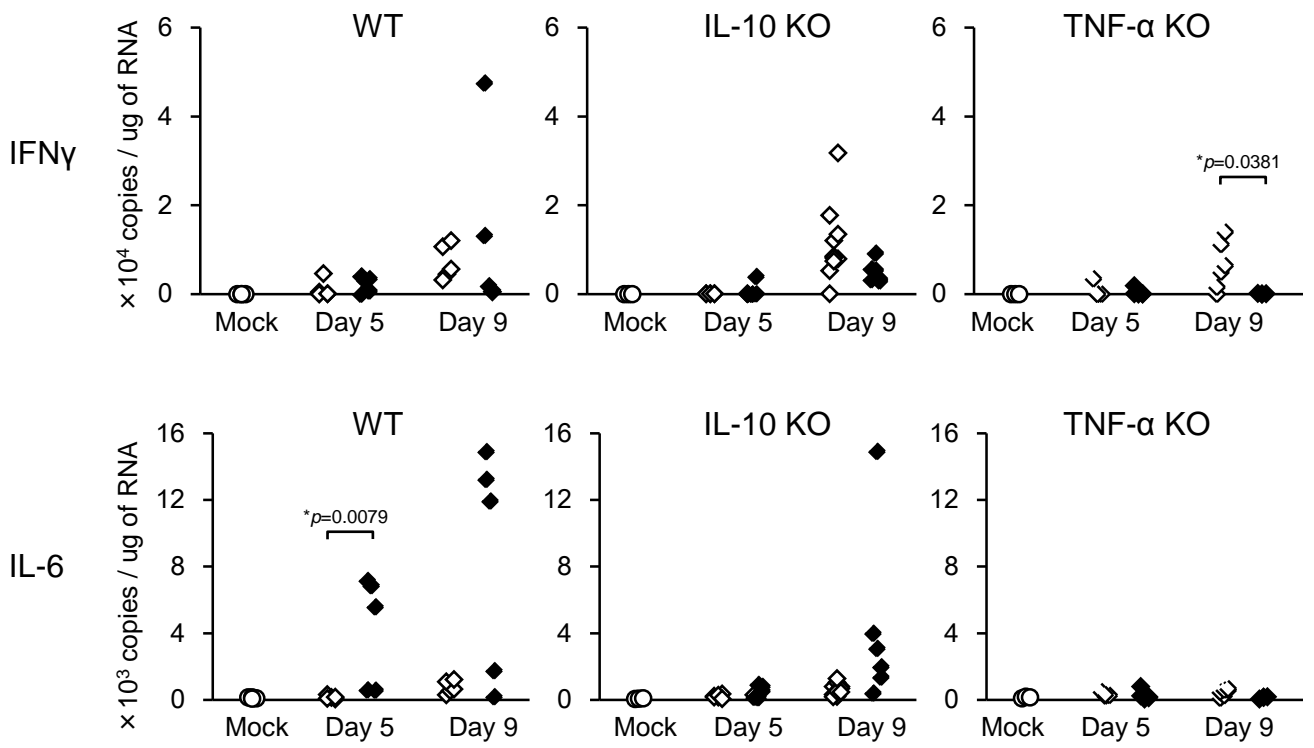

Supplementary figure 4

◇ Mock ◇ Day 5 ◇ Day 9

(a) Oshima

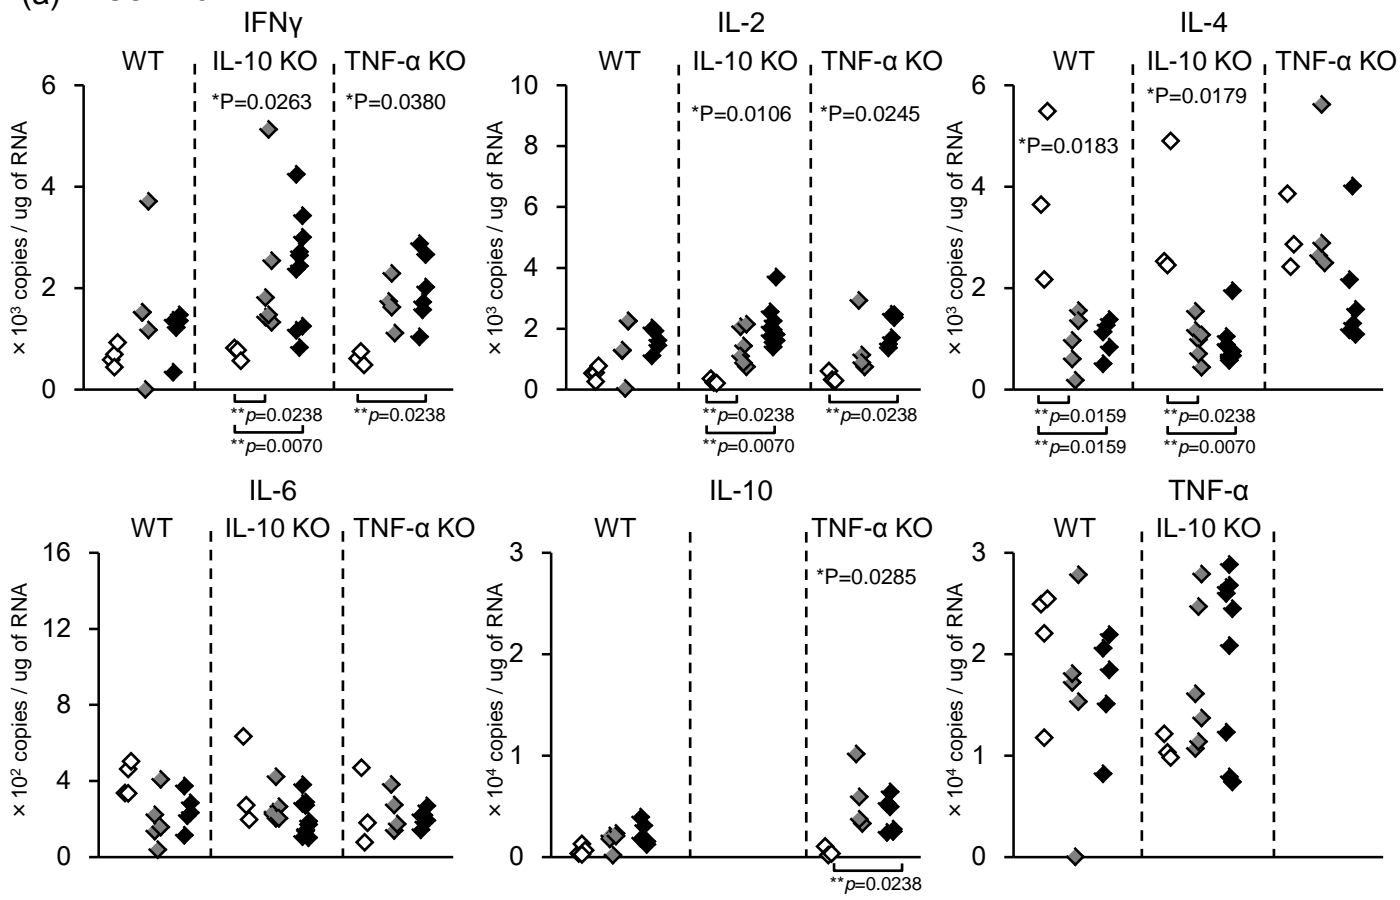

(b) Sofjin

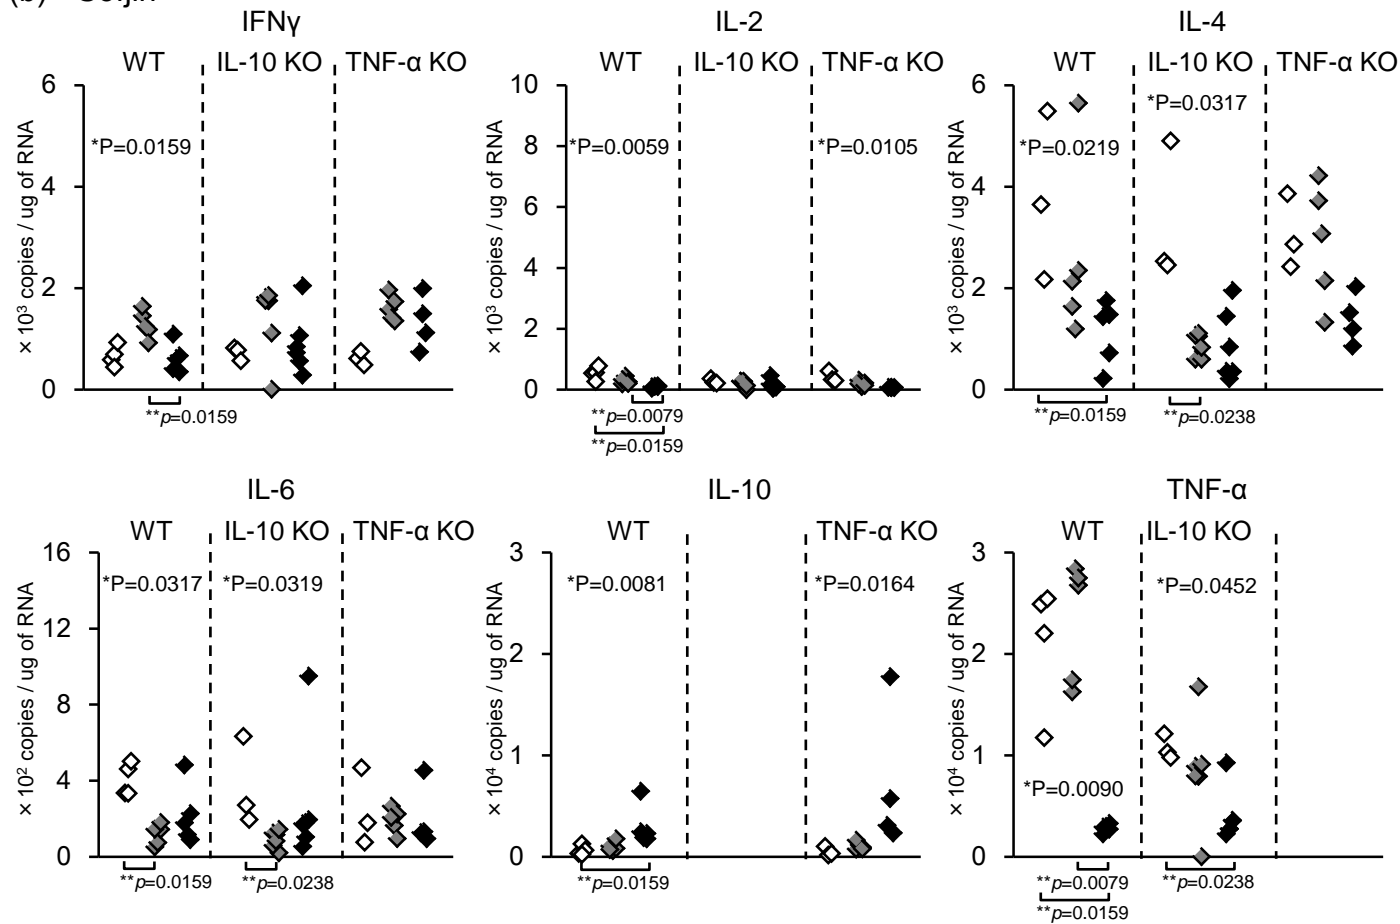

Supplementary figure 5

○ Mock ◇ Oshima ◇ Sofjin

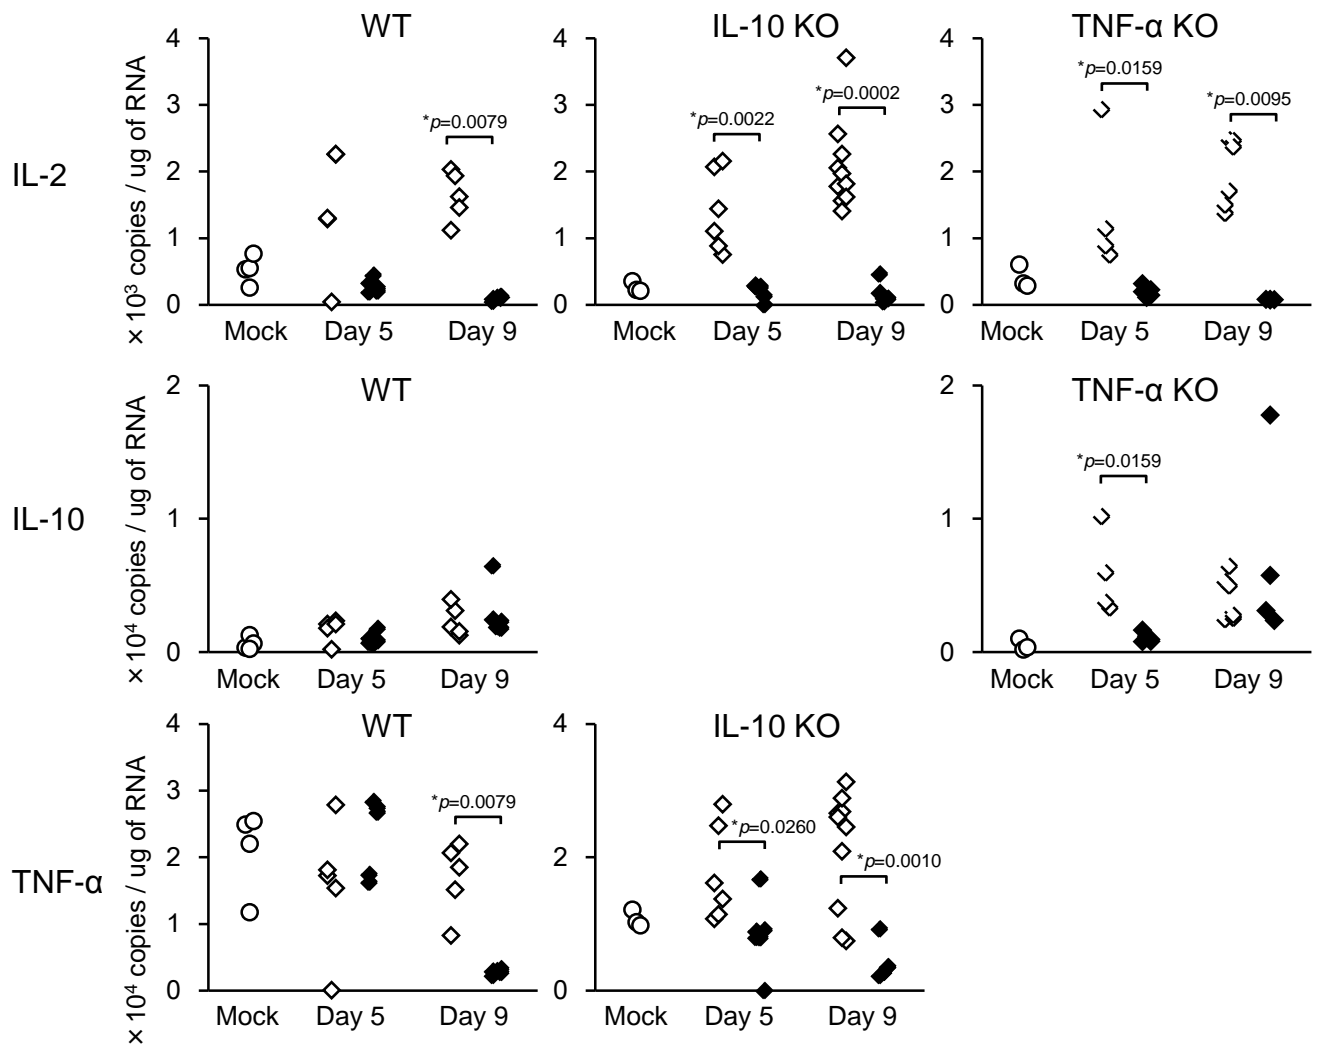

Supplementary table

|        | TBEV strain      | IFN $\gamma$ | IL-2 | IL-4 | IL-6 | IL-10 | TNF- $\alpha$ |    |
|--------|------------------|--------------|------|------|------|-------|---------------|----|
| Brain  | WT               | Oshima       | ↑    | ↑    | —    | ↑     | —             | ↑  |
|        |                  | Sofjin       | ↑    | —    | —    | ↑     | —             | ↑  |
|        | IL-10 KO         | Oshima       | ↑    | ↑    | —    | ↑     | ND            | ↑  |
|        |                  | Sofjin       | ↑    | ↑    | —    | ↑     | ND            | ↑  |
|        | TNF- $\alpha$ KO | Oshima       | ↑    | ↑    | —    | —     | —             | ND |
|        |                  | Sofjin       | —    | —    | —    | —     | —             | ND |
| Spleen | WT               | Oshima       | —    | —    | ↓    | —     | —             | —  |
|        |                  | Sofjin       | ↑    | ↓    | ↓    | ↓     | ↑             | ↓  |
|        | IL-10 KO         | Oshima       | ↑    | ↑    | ↓    | —     | ND            | —  |
|        |                  | Sofjin       | —    | —    | ↓    | ↓     | ND            | ↓  |
|        | TNF- $\alpha$ KO | Oshima       | ↑    | ↑    | —    | —     | ↑             | ND |
|        |                  | Sofjin       | —    | ↓    | —    | —     | ↑             | ND |
